# Supplementary material for: An open-source tool for automated analysis of breathing behaviors in common marmosets and rodents
Source: eLife. 2022 Jan 20;11:e71647. doi: 10.7554/eLife.71647 (PMC8856653; doi:10.7554/eLife.71647)
Supplement: Figure 3—source data 1. [file elife-71647-fig3-data1.xlsx]

## Sheet: prechallenge
Animal	Chall_type	Sex	RSP_Rate_Mean	RSP_Amplitude_Mean	Ti	Te	Ti-Te_Ratio	Resp_Drive	Ve	Apnea_time	Apnea_rate	Sniff_time	Sniff_rate	RRV_SD1	RRV_SD2
8	CO2	F	66.8601	0.00045572	0.404379	0.536821	0.753285	0.00112696	0.0304695	51.6397	96	1.70755	48	596.93	820.816
9	CO2	F	92.6579	0.000516659	0.318245	0.349243	0.911241	0.00162347	0.0478726	40.4342	83.829	6.25825	131.731	366.353	580.63
10	CO2	F	78.8755	0.000318034	0.29625	0.48865	0.606263	0.00107353	0.0250851	18.825	23.9952	4.7037	137.972	321.53	573.203
11	CO2	F	46.1197	0.000257693	0.44815	0.96597	0.463938	0.000575016	0.0118847	146.956	192.019	1.4821	36.0036	1129.49	1524.47
12	CO2	M	65.4272	0.000650718	0.362059	0.613003	0.590632	0.00179727	0.0425746	65.5856	221.973	4.42458	35.9957	523.213	717.243
13	CO2	M	82.5357	0.000411368	0.335969	0.414796	0.809962	0.00122442	0.0339526	9.22561	35.9957	3.11268	65.9921	269.252	379.222
14	CO2	M	45.4692	0.000294584	0.468203	0.958066	0.488696	0.000629181	0.0133945	56.9202	114.011	0.7096	6.0006	940.328	1100.4
15	CO2	M	115.593	0.0004313	0.259126	0.278438	0.930641	0.00166444	0.0498553	51.6459	263.947	22.6065	335.933	256.324	367.438

## Sheet: challenge
Animal	Chall_type	Sex	RSP_Rate_Mean	RSP_Amplitude_Mean	Ti	Te	Ti-Te_Ratio	Resp_Drive	Ve	Apnea_time	Apnea_rate	Sniff_time	Sniff_rate	RRV_SD1	RRV_SD2
8	CO2	F	70.1506	0.00118723	0.377413	0.487519	0.774151	0.0031457	0.0832848	0	0	0.131765	12	186.634	244.38
9	CO2	F	99.5423	0.00103299	0.296465	0.309167	0.958915	0.00348434	0.102826	0	0	0.153126	12	90.5082	135.304
10	CO2	F	110.519	0.00103906	0.227561	0.318302	0.714922	0.00456605	0.114836	0	0	0	0	89.6684	132.295
11	CO2	F	67.176	0.000673365	0.20598	0.691536	0.297859	0.00326908	0.045234	0	0	0	0	97.6323	162.328
12	CO2	M	80.8476	0.00165396	0.270156	0.491034	0.550176	0.00612226	0.133719	3.78447	36	4.0366	120	219.942	421.78
13	CO2	M	73.4764	0.00107865	0.236752	0.582654	0.406333	0.00455602	0.0792551	0	0	0	0	108.644	165.62
14	CO2	M	66.2283	0.000676373	0.235975	0.675132	0.349524	0.00286629	0.044795	0	0	0	0	135.306	145.551
15	CO2	M	129.106	0.00100379	0.218911	0.250233	0.874831	0.00458537	0.129595	3.1296	36	3.2952	72	123.526	176.041

## Sheet: postchallenge
Animal	Chall_type	Sex	RSP_Rate_Mean	RSP_Amplitude_Mean	Ti	Te	Ti-Te_Ratio	Resp_Drive	Ve	Apnea_time	Apnea_rate	Sniff_time	Sniff_rate	RRV_SD1	RRV_SD2
8	CO2	F	78.292	0.000539995	0.353995	0.441068	0.802584	0.00152543	0.0422773	7.40442	29.4537	3.89932	49.0895	306.62	373.404
9	CO2	F	81.6744	0.000432548	0.327592	0.42157	0.777076	0.00132039	0.0353281	18.1979	22.0007	0.75819	16.5005	325.41	422.013
10	CO2	F	92.3704	0.000609452	0.293068	0.379587	0.772072	0.00207956	0.0562954	59.5028	89.7293	9.6812	194.413	491.169	762.818
11	CO2	F	47.5016	0.000234074	0.385865	0.964855	0.399921	0.00060662	0.0111189	405.787	137.519	2.6978	21.2659	928.953	1418.94
12	CO2	M	67.9039	0.00107858	0.323465	0.608031	0.531988	0.00333447	0.07324	125.504	220.068	14.9593	84.3594	568.255	843.422
13	CO2	M	71.8543	0.00048327	0.374032	0.486296	0.769144	0.00129205	0.034725	18.1684	35.0994	2.35569	46.7993	388.986	489.094
14	CO2	M	50.9805	0.000296445	0.417844	0.839945	0.497466	0.000709464	0.0151129	311.527	154.003	7.5345	30.334	733.302	929.16
15	CO2	M	91.9836	0.000420506	0.305989	0.368462	0.830448	0.00137425	0.0386797	10.0942	41.4422	9.0081	98.8238	255.168	327.206
