# Supplementary material for: An open-source tool for automated analysis of breathing behaviors in common marmosets and rodents
Source: eLife. 2022 Jan 20;11:e71647. doi: 10.7554/eLife.71647 (PMC8856653; doi:10.7554/eLife.71647)
Supplement: Figure 5—source data 1. [file elife-71647-fig5-data1.xlsx]

## Sheet: prechallenge
Animal	Chall_type	Sex	RSP_Rate_Mean	RSP_Amplitude_Mean	Ti	Te	Ti-Te_Ratio	Resp_Drive	Ve	Apnea_time	Apnea_rate	Sniff_time	Sniff_rate	RRV_SD1	RRV_SD2
0	O2	F	108.273	0.000316255	0.238028	0.337522	0.705222	0.00132865	0.034242	22.1789	102	9.4586	234	291.499	335.119
1	O2	F	74.6012	0.00025802	0.256957	0.568592	0.451918	0.00100414	0.0192486	11.0099	17.9964	1.7683	23.9952	330.12	443.577
2	O2	F	92.5899	0.00106626	0.329821	0.338094	0.97553	0.00323285	0.098725	73.4541	108.011	2.2312	54.0054	567.42	857.798
3	O2	F	69.3008	0.000216103	0.380692	0.578546	0.658015	0.00056766	0.0149761	38.8648	168	3.6418	72	520.928	635.422
4	O2	M	49.7895	0.000694386	0.375404	0.8316	0.451424	0.0018497	0.0345731	40.827	24.0072	0.4011	0	417.705	580.786
5	O2	M	73.8824	0.000214915	0.252434	0.571992	0.441325	0.00085137	0.0158784	6.0137	12	0.6199	0	243.172	266.939
6	O2	M	90.8394	0.000722343	0.289534	0.396503	0.730219	0.00249485	0.0656172	19.0352	95.9885	6.10584	143.983	336.344	400.539
7	O2	M	97.2634	0.000859793	0.281973	0.361392	0.780241	0.00304921	0.0836264	23.3055	102	12.4469	282	281.374	385.197
8	CO2	F	66.8601	0.00045572	0.404379	0.536821	0.753285	0.00112696	0.0304695	51.6397	96	1.70755	48	596.93	820.816
9	CO2	F	92.6579	0.000516659	0.318245	0.349243	0.911241	0.00162347	0.0478726	40.4342	83.829	6.25825	131.731	366.353	580.63
10	CO2	F	78.8755	0.000318034	0.29625	0.48865	0.606263	0.00107353	0.0250851	18.825	23.9952	4.7037	137.972	321.53	573.203
11	CO2	F	46.1197	0.000257693	0.44815	0.96597	0.463938	0.000575016	0.0118847	146.956	192.019	1.4821	36.0036	1129.49	1524.47
12	CO2	M	65.4272	0.000650718	0.362059	0.613003	0.590632	0.00179727	0.0425746	65.5856	221.973	4.42458	35.9957	523.213	717.243
13	CO2	M	82.5357	0.000411368	0.335969	0.414796	0.809962	0.00122442	0.0339526	9.22561	35.9957	3.11268	65.9921	269.252	379.222
14	CO2	M	45.4692	0.000294584	0.468203	0.958066	0.488696	0.000629181	0.0133945	56.9202	114.011	0.7096	6.0006	940.328	1100.4
15	CO2	M	115.593	0.0004313	0.259126	0.278438	0.930641	0.00166444	0.0498553	51.6459	263.947	22.6065	335.933	256.324	367.438

## Sheet: challenge
Animal	Chall_type	Sex	RSP_Rate_Mean	RSP_Amplitude_Mean	Ti	Te	Ti-Te_Ratio	Resp_Drive	Ve	Apnea_time	Apnea_rate	Sniff_time	Sniff_rate	RRV_SD1	RRV_SD2
0	O2	F	69.4399	0.000155076	0.257588	0.629246	0.409361	0.000602032	0.0107685	8.8648	36	0.8045	48	431.256	469.828
1	O2	F	82.4264	0.000266355	0.277719	0.479596	0.579067	0.000959083	0.0219547	3.6694	48	1.7412	108	311.548	397.77
2	O2	F	98.653	0.000520442	0.275359	0.346874	0.79383	0.00189005	0.0513432	2.995	36	2.7489	84	204.123	248.321
3	O2	F	55.7029	0.000102722	0.33551	0.801065	0.41883	0.000306167	0.00572193	12.6191	108	2.0988	84	506.34	674.815
4	O2	M	53.9886	0.000708032	0.420066	0.724838	0.579531	0.00168553	0.0382257	0	0	0.9615	48	345.623	444.019
5	O2	M	81.8802	0.000209493	0.354869	0.389318	0.911514	0.00059034	0.0171533	0	0	0.3215	24	181.703	205.391
6	O2	M	73.4893	0.000512318	0.33511	0.515166	0.65049	0.00152881	0.0376499	5.29821	36	0.582623	60	377.678	411.947
7	O2	M	78.2385	0.000674238	0.287237	0.502624	0.571475	0.00234733	0.0527514	6.87159	36	3.07644	132	279.999	499.918
8	CO2	F	70.1506	0.00118723	0.377413	0.487519	0.774151	0.0031457	0.0832848	0	0	0.131765	12	186.634	244.38
9	CO2	F	99.5423	0.00103299	0.296465	0.309167	0.958915	0.00348434	0.102826	0	0	0.153126	12	90.5082	135.304
10	CO2	F	110.519	0.00103906	0.227561	0.318302	0.714922	0.00456605	0.114836	0	0	0	0	89.6684	132.295
11	CO2	F	67.176	0.000673365	0.20598	0.691536	0.297859	0.00326908	0.045234	0	0	0	0	97.6323	162.328
12	CO2	M	80.8476	0.00165396	0.270156	0.491034	0.550176	0.00612226	0.133719	3.78447	36	4.0366	120	219.942	421.78
13	CO2	M	73.4764	0.00107865	0.236752	0.582654	0.406333	0.00455602	0.0792551	0	0	0	0	108.644	165.62
14	CO2	M	66.2283	0.000676373	0.235975	0.675132	0.349524	0.00286629	0.044795	0	0	0	0	135.306	145.551
15	CO2	M	129.106	0.00100379	0.218911	0.250233	0.874831	0.00458537	0.129595	3.1296	36	3.2952	72	123.526	176.041

## Sheet: postchallenge
Animal	Chall_type	Sex	RSP_Rate_Mean	RSP_Amplitude_Mean	Ti	Te	Ti-Te_Ratio	Resp_Drive	Ve	Apnea_time	Apnea_rate	Sniff_time	Sniff_rate	RRV_SD1	RRV_SD2
0	O2	F	88.6415	0.000314757	0.267881	0.432392	0.619533	0.00117499	0.0279005	28.4563	59.5414	6.7782	135.321	318.883	481.116
1	O2	F	75.5788	0.00019455	0.25621	0.557057	0.459935	0.000759337	0.0147038	0	0	0.5087	23.9889	252.904	301.237
2	O2	F	81.5579	0.000696982	0.350932	0.407115	0.861996	0.00198609	0.0568444	25.0827	26.816	0.9642	26.816	429.526	633.682
3	O2	F	54.7734	0.000189934	0.359736	0.783248	0.459287	0.000527981	0.0104033	38.3604	23.7962	4.0923	29.7453	533.203	786.793
4	O2	M	58.2065	0.000912616	0.38496	0.685458	0.561609	0.00237068	0.0531202	70.7953	26.6363	4.1757	23.6767	487.106	732.777
5	O2	M	80.5965	0.000189677	0.328954	0.424942	0.774116	0.000576605	0.0152873	8.5262	4.90403	0.5536	14.7121	239.651	359.801
6	O2	M	77.4048	0.000566264	0.331949	0.486826	0.681863	0.00170588	0.0438316	26.0824	65.5866	3.67491	69.959	417.689	463.931
7	O2	M	69.3635	0.000705353	0.40529	0.521225	0.777572	0.00174037	0.0489258	61.8872	235.467	1.62054	96.3273	724.184	870.773
8	CO2	F	78.292	0.000539995	0.353995	0.441068	0.802584	0.00152543	0.0422773	7.40442	29.4537	3.89932	49.0895	306.62	373.404
9	CO2	F	81.6744	0.000432548	0.327592	0.42157	0.777076	0.00132039	0.0353281	18.1979	22.0007	0.75819	16.5005	325.41	422.013
10	CO2	F	92.3704	0.000609452	0.293068	0.379587	0.772072	0.00207956	0.0562954	59.5028	89.7293	9.6812	194.413	491.169	762.818
11	CO2	F	47.5016	0.000234074	0.385865	0.964855	0.399921	0.00060662	0.0111189	405.787	137.519	2.6978	21.2659	928.953	1418.94
12	CO2	M	67.9039	0.00107858	0.323465	0.608031	0.531988	0.00333447	0.07324	125.504	220.068	14.9593	84.3594	568.255	843.422
13	CO2	M	71.8543	0.00048327	0.374032	0.486296	0.769144	0.00129205	0.034725	18.1684	35.0994	2.35569	46.7993	388.986	489.094
14	CO2	M	50.9805	0.000296445	0.417844	0.839945	0.497466	0.000709464	0.0151129	311.527	154.003	7.5345	30.334	733.302	929.16
15	CO2	M	91.9836	0.000420506	0.305989	0.368462	0.830448	0.00137425	0.0386797	10.0942	41.4422	9.0081	98.8238	255.168	327.206
