# Supplementary material for: An open-source tool for automated analysis of breathing behaviors in common marmosets and rodents
Source: eLife. 2022 Jan 20;11:e71647. doi: 10.7554/eLife.71647 (PMC8856653; doi:10.7554/eLife.71647)
Supplement: Figure 6—source data 1. [file elife-71647-fig6-data1.xlsx]

## Sheet: Sheet1
Animal	Sex	Condition	Base_length	Challenge_length	Baseline_rate	Challenge_rate	Baseline_Net	Challenge_Net	Percent_change			Basline Net/min	Chall Net/min
1	F	CO2	300.017	149.017	2.79984	4.42903	1.67077	1.57696	58.1886			100.246	94.6179
2	M	CO2	300.017	0	7.39959		2.04341					122.605	0
2	M	CO2	0.0166667	196.017	0	4.59145	0	2.75333	inf			0	165.2
3	M	CO2	93.0167	373.017	3.87027	3.05616	2.28364	1.993	-21.035			137.019	119.58
4	M	O2	257.017	319.017	7.23688	7.7112	2.78281	2.02092	6.55408			166.969	121.255
5	F	O2	300.017	0	6.79962		2.36228					141.737	0
5	F	O2	0.0166667	66.0167	0	1.81772	0	2.89371	inf			0	173.622
6	F	O2	300.017	309.083	2.19988	2.71771	1.27623	1.29832	23.5393			76.5738	77.8993
