# Supplementary figures and images for: An open-source tool for automated analysis of breathing behaviors in common marmosets and rodents
Source: eLife journal article supplement (doi:10.7554/elife.71647), 2022-01-20

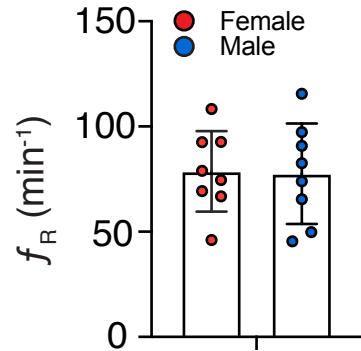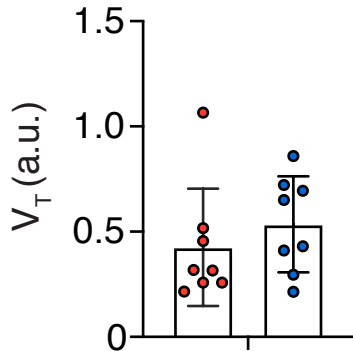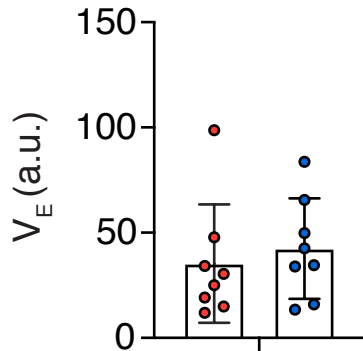

Supplement: supp [file elife-71647-supp-v1.zip]

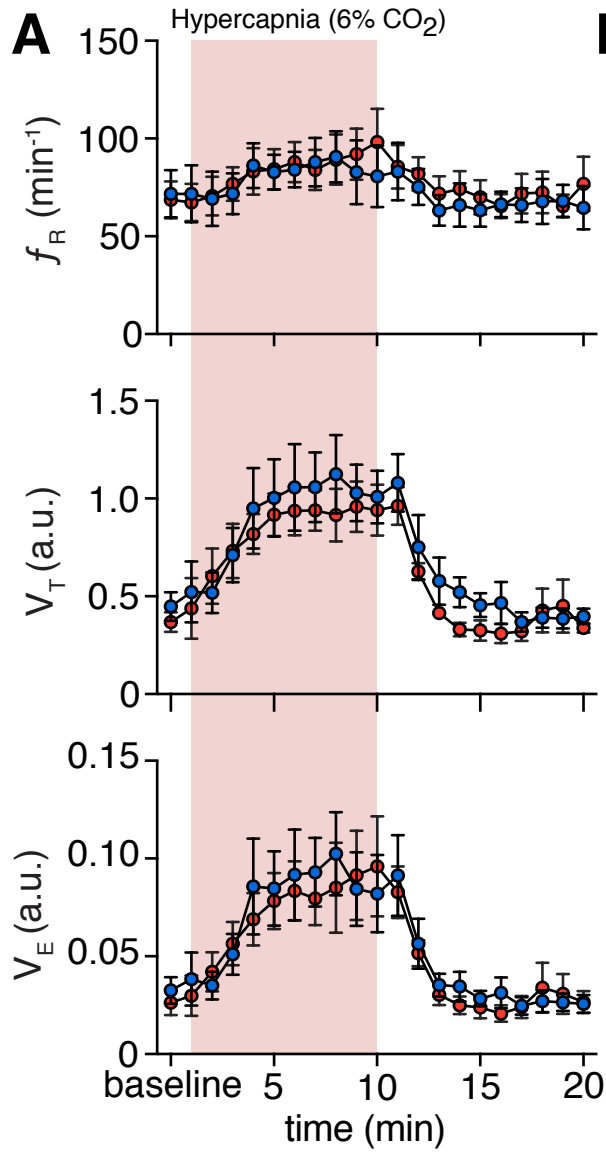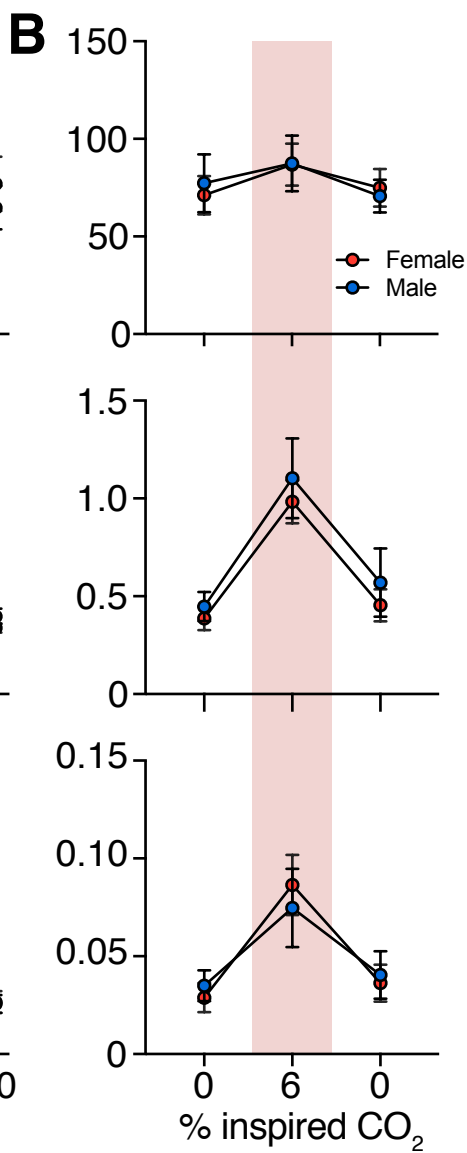

Supplement: supp [file elife-71647-supp-v1.zip]

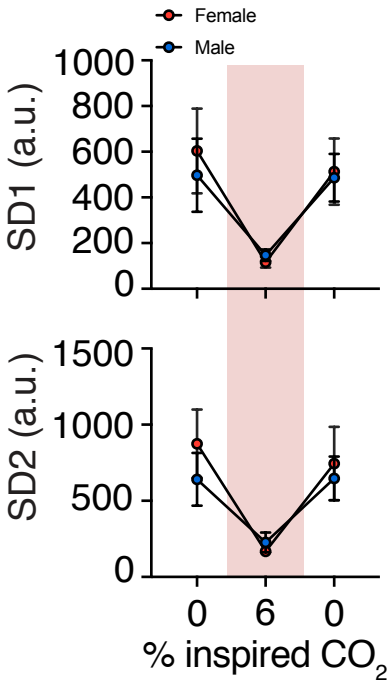

Supplement: supp [file elife-71647-supp-v1.zip]

**A**

respiratory activity

Room air

6% CO<sub>2</sub>

5 sec

**B**

respiratory activity

Room air

10% O<sub>2</sub>

5 sec

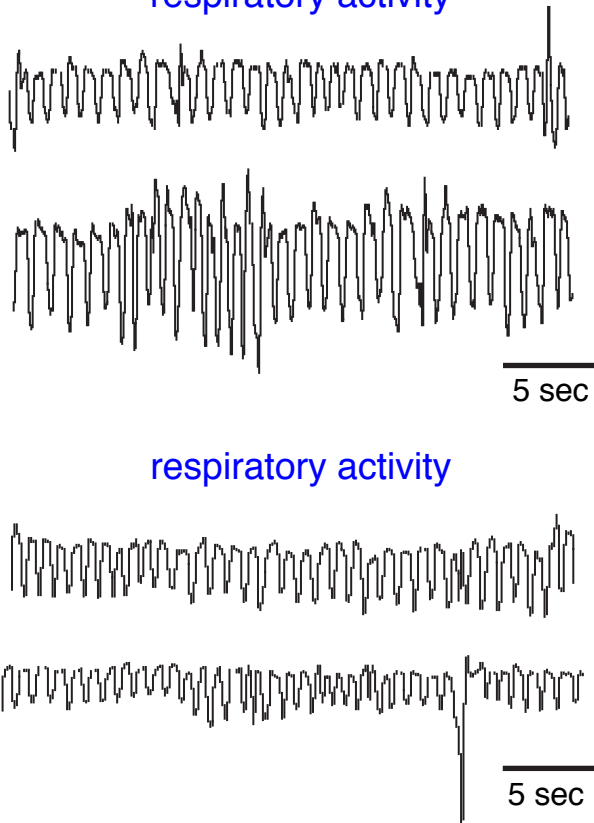

Supplement: supp [file elife-71647-supp-v1.zip]

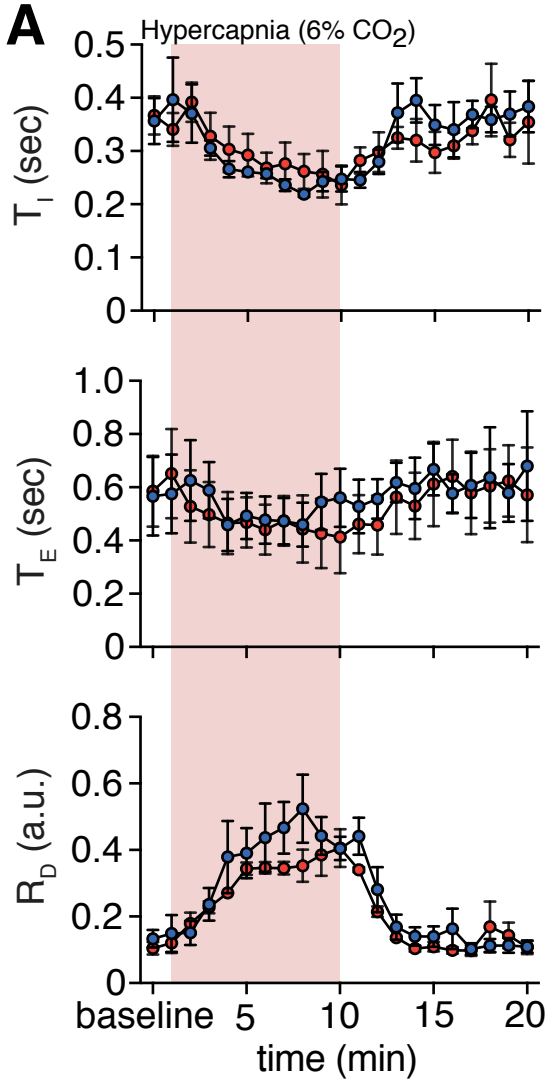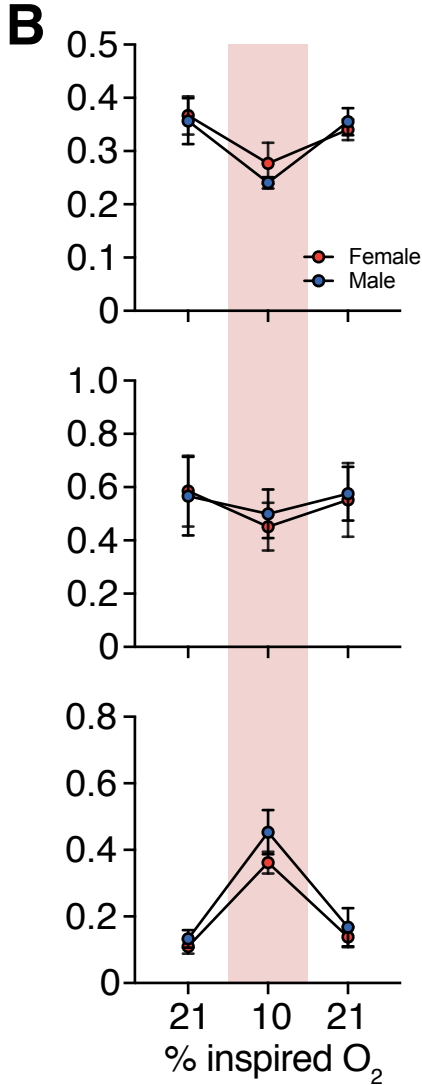

Supplement: supp [file elife-71647-supp-v1.zip]

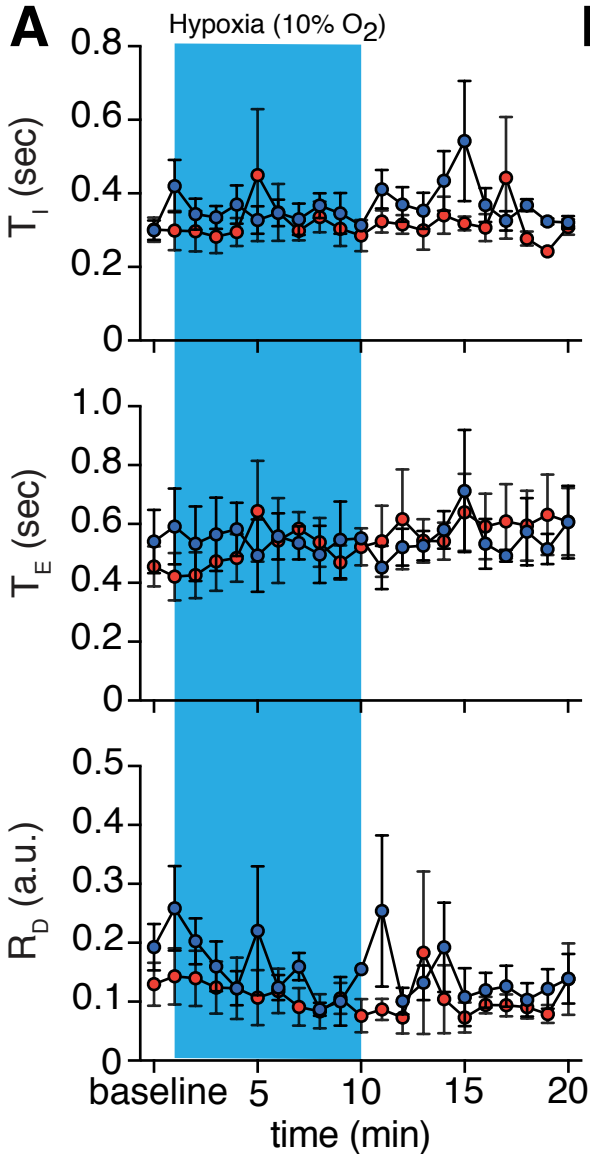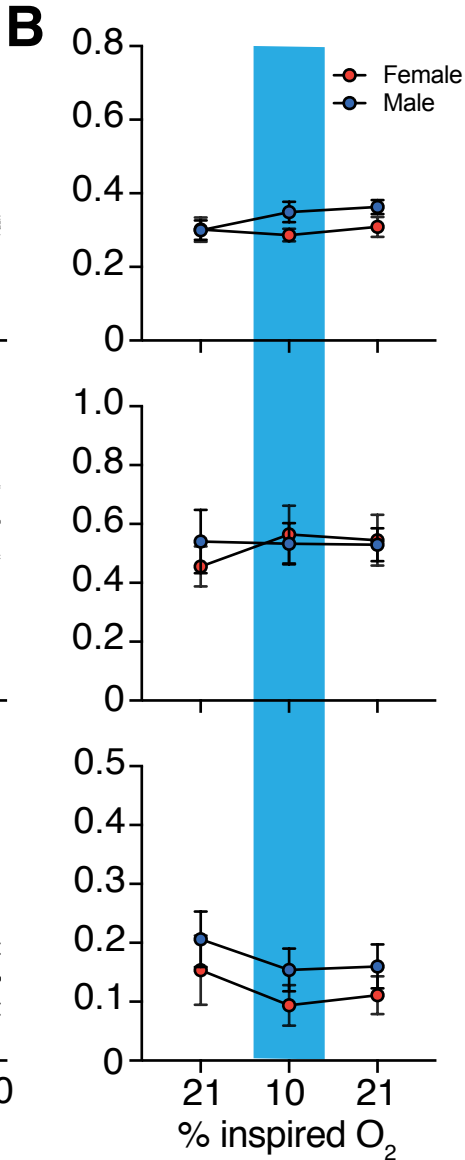

Supplement: supp [file elife-71647-supp-v1.zip]

NeuroKit2  
Conventional method

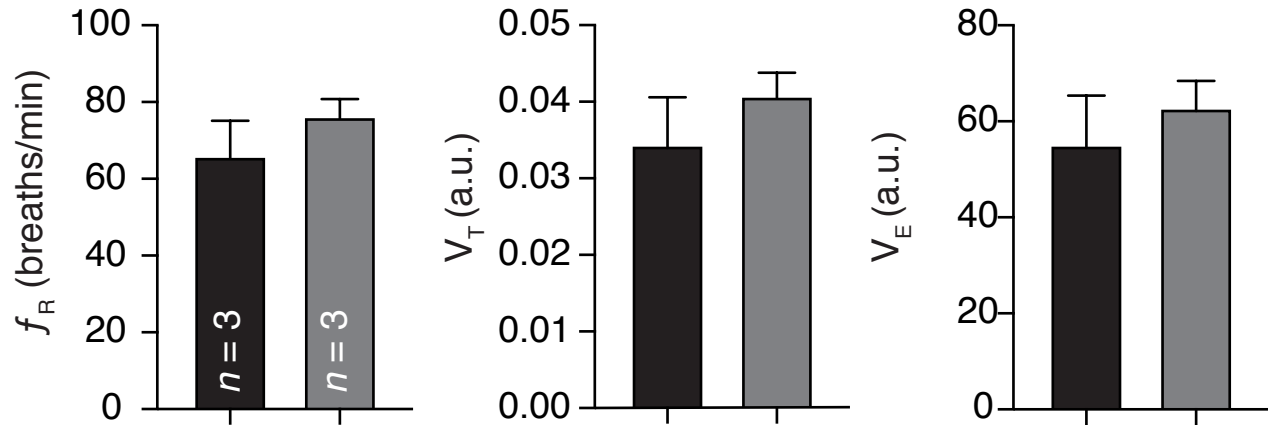

Supplement: supp [file elife-71647-supp-v1.zip]

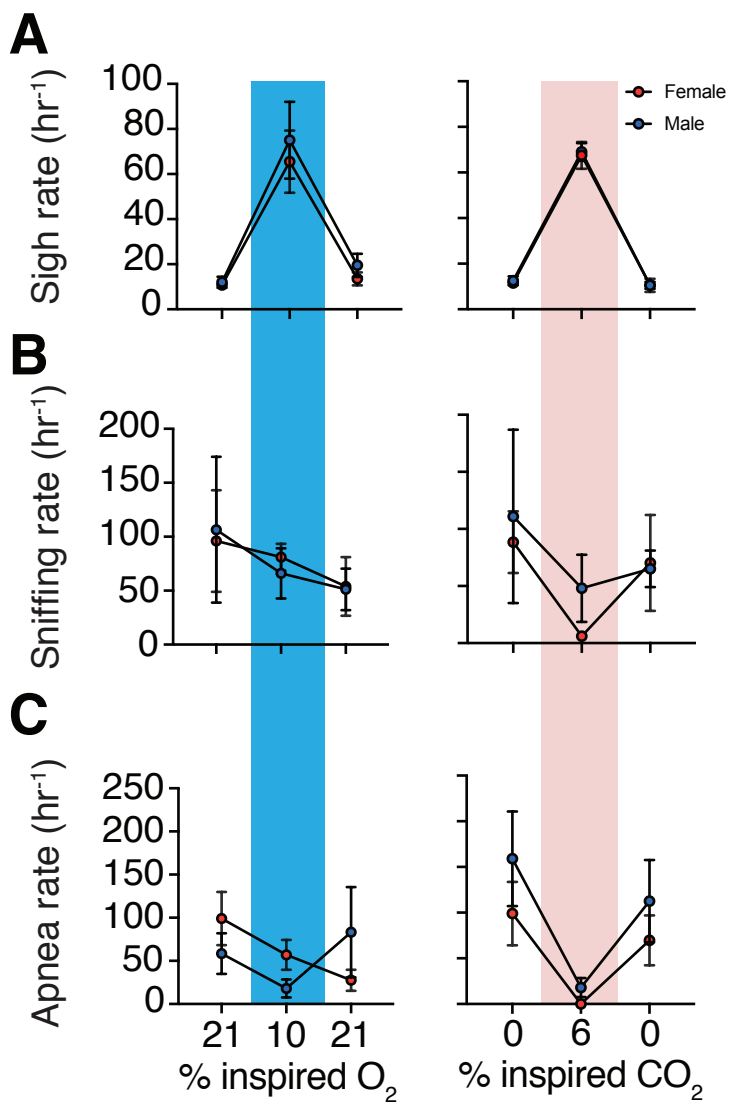

Supplement: supp [file elife-71647-supp-v1.zip]

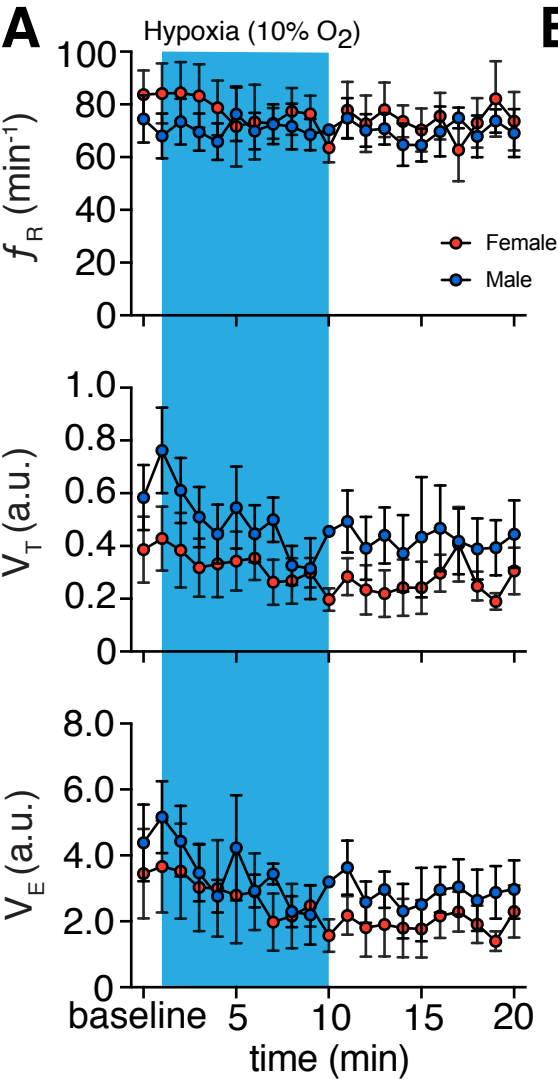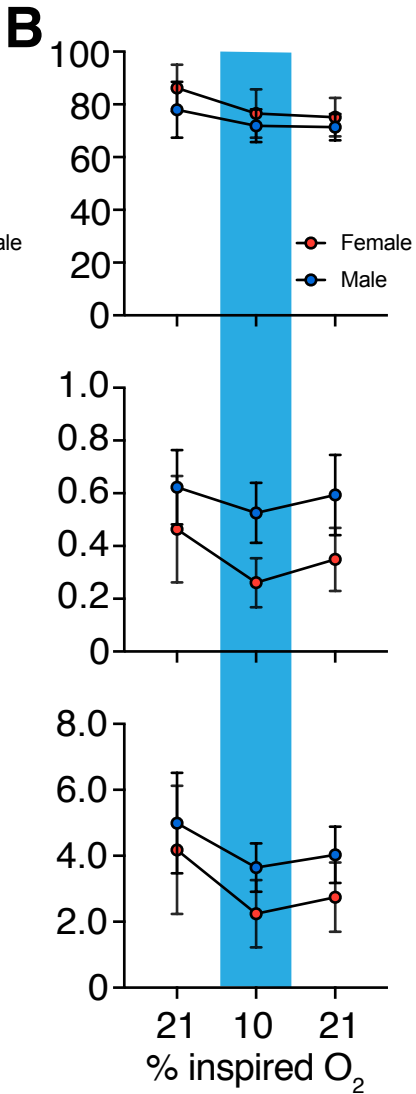

Supplement: supp [file elife-71647-supp-v1.zip]

Female

Male

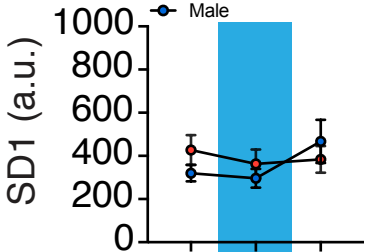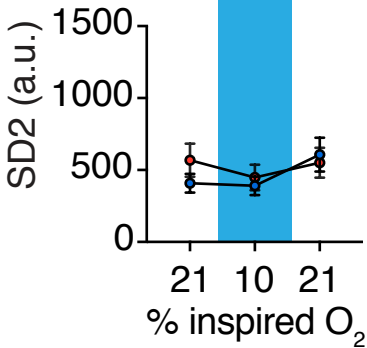

Supplement: supp [file elife-71647-supp-v1.zip]

**A**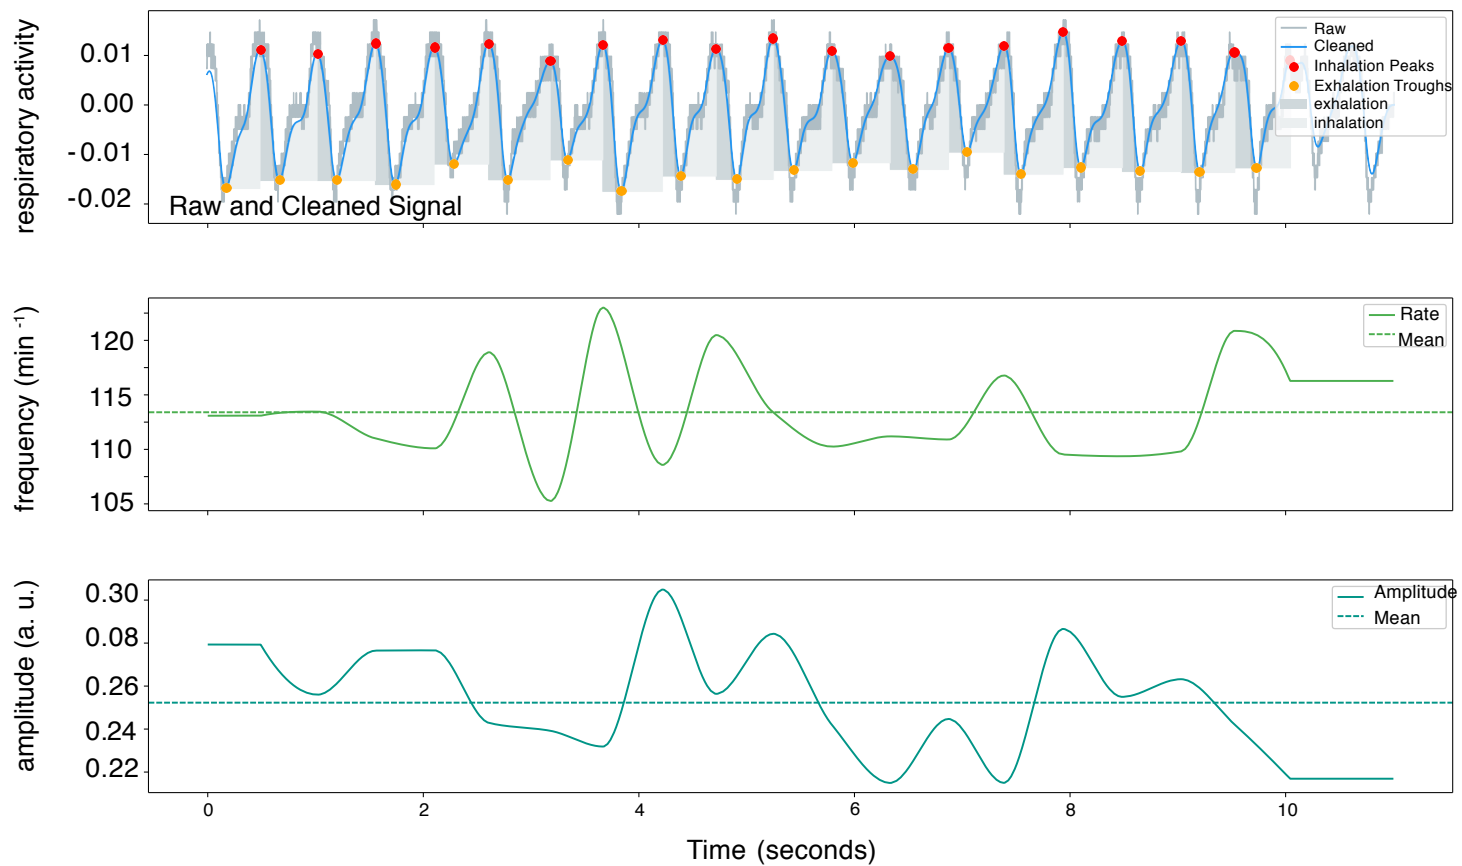**B**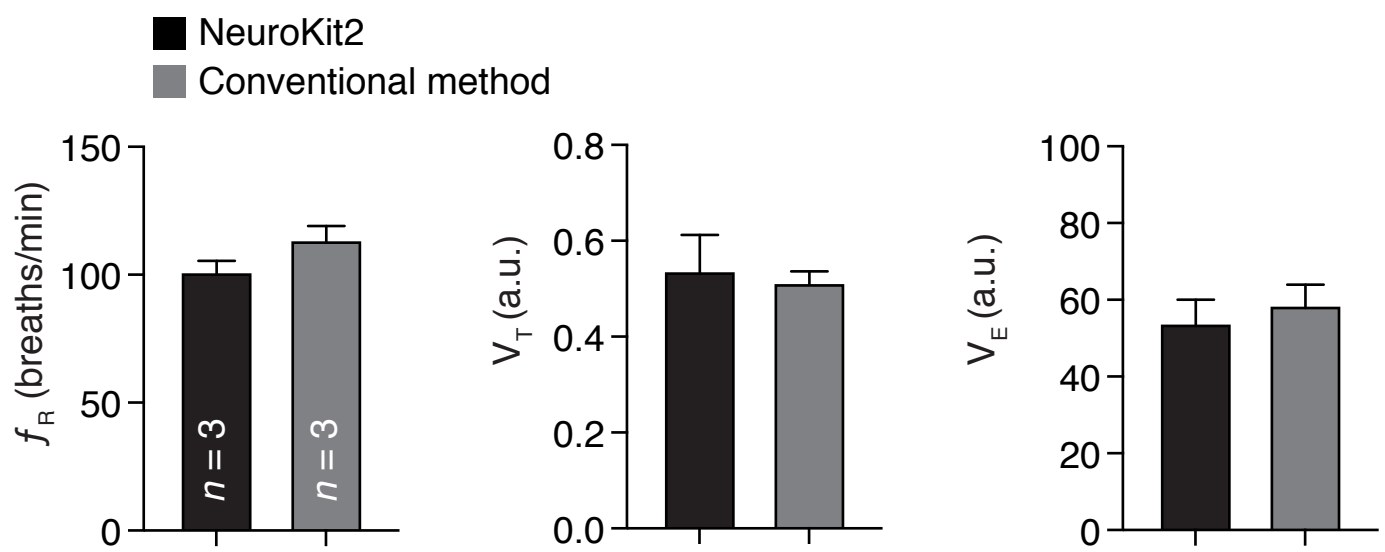

Supplement: supp [file elife-71647-supp-v1.zip]
